# Supplementary material for: Specific inhibition of FGF5-induced cell proliferation by RNA aptamers
Source: PubMed Central journal article supplement (PMC7858594; doi:10.1038/s41598-021-82350-w), 2021-02-03
Supplement: 41598_2021_82350_MOESM1_ESM.pdf [file 41598_2021_82350_MOESM1_ESM.pdf]

## Supplementary Information

### *Specific Inhibition of FGF5-induced Cell Proliferation by RNA Aptamers*

Ryo Amano<sup>1</sup>, Masato Namekata<sup>2</sup>, Masataka Horiuchi<sup>3</sup>, Minami Saso<sup>1</sup>, Takuya Yanagisawa<sup>1</sup>,  
Yoichiro Tanaka<sup>4</sup>, Farhana Ishrat Ghani<sup>2</sup>, Masakuni Yamamoto<sup>2</sup>, Taiichi Sakamoto<sup>1\*</sup>

Corresponding Author:

\* Taiichi Sakamoto<sup>1</sup>

Department of Life Science, Faculty of Advanced Engineering, Chiba Institute of Technology,  
2-17-1 Tsudanuma, Narashino-shi, Chiba 275-0016, Japan

Telephone: +81-47-478-0317;

Fax: +81-47-478-0317;

#### **This file includes:**

Figure S1. Immunoblotting image of phospho-FGFR1 in FGF5-stimulated NIH3T3 cells in the presence of F5f1 (lanes 3–6) or random RNA (lanes 7–10).

Figure S2. SPR sensorgrams of FGF5 binding to the aptamers.

Figure S3. SPR sensorgrams of nonspecific binding of FGF5 to the random RNA.

Figure S4. Pairwise sequence alignment of FGF5 and FGF4 (a), FGF6 (b), FGF1 (c) or FGF2 (d).

Figure S5. Sequences and predicted secondary structures of aptamers against FGF2, FGFR1, and FGFR3.

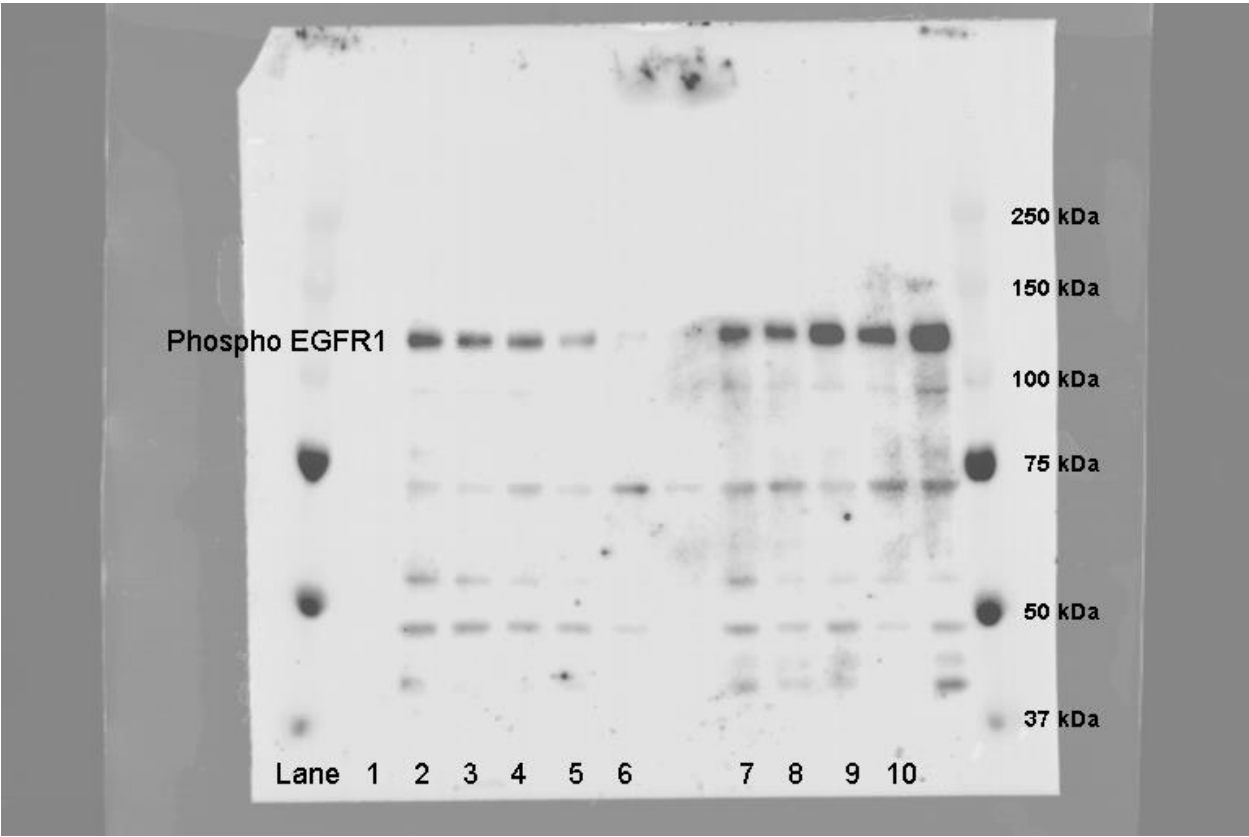

Figure S1. Immunoblotting image of phospho-FGFR1 in FGF5-stimulated NIH3T3 cells in the presence of F5f1 (lanes 3–6) or random RNA (lanes 7–10).

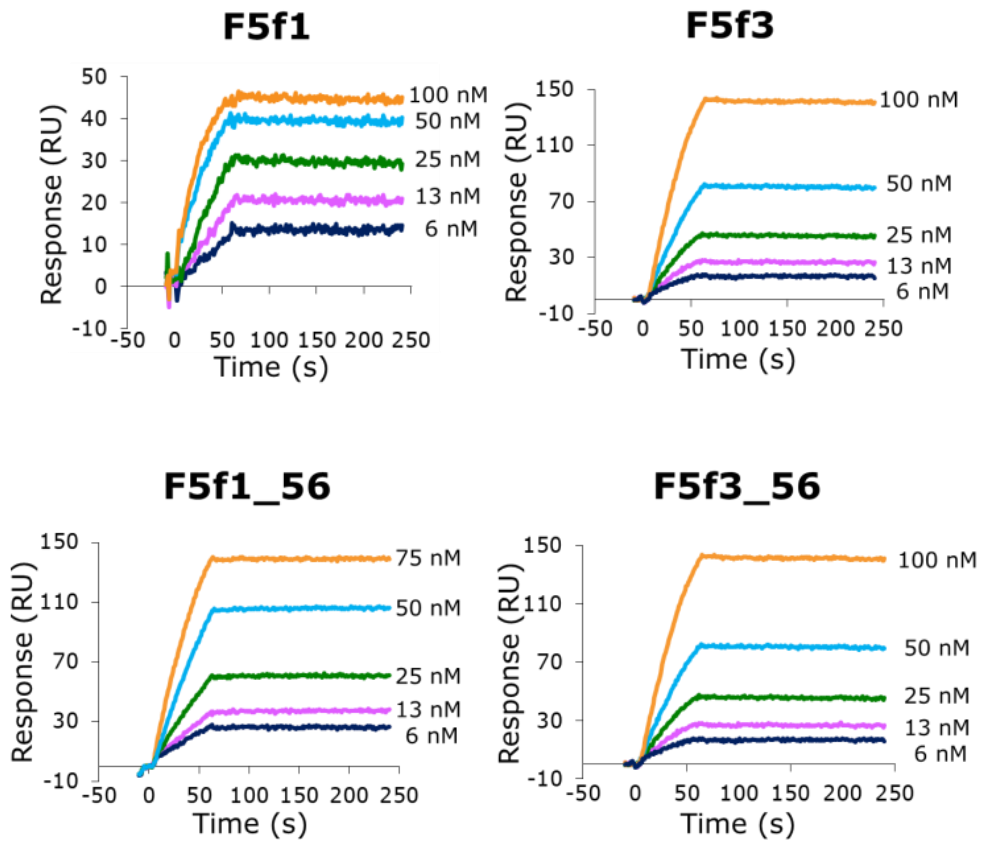

**Figure S2. SPR sensorgrams of FGF5 binding to the aptamers.** The aptamers F5f1, F5f3, F5f1\_56, or F5f3 were immobilized on the sensor chips and various concentrations of FGF5 in SPR running buffer was injected for 60 s and dissociated for 180 s.

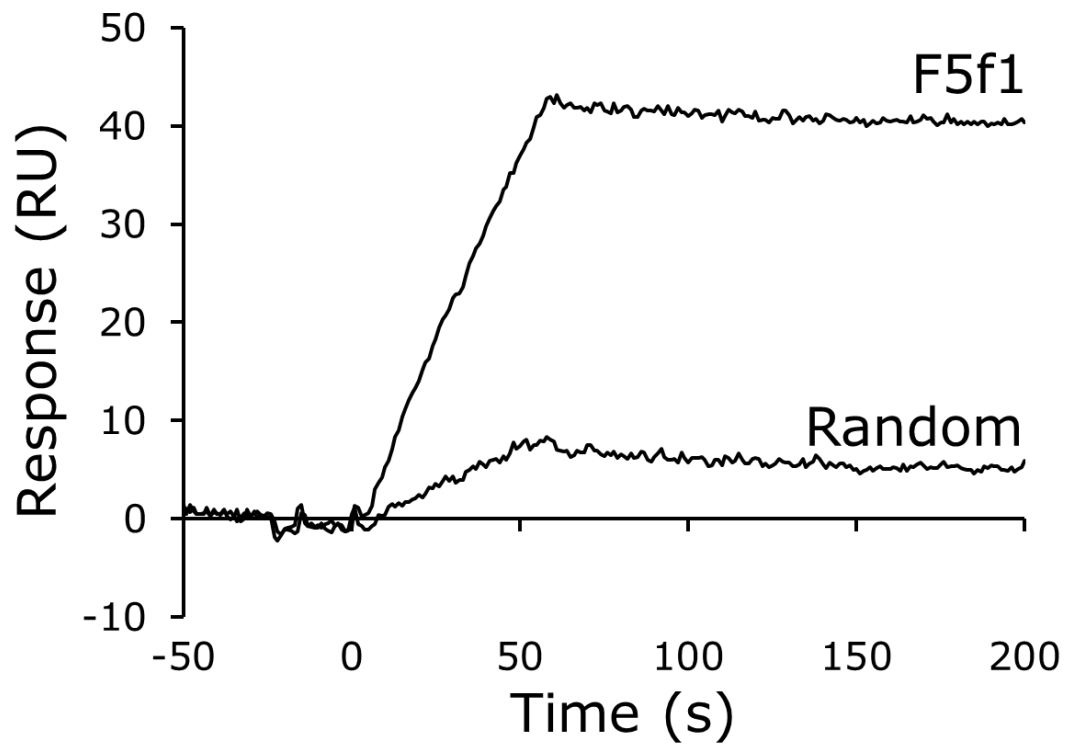

**Figure S3. SPR sensorgrams of nonspecific binding of FGF5 to the random RNA.** The random RNA pool and aptamers were immobilized to approximately 100 RU on the sensor chip and FGF5 in SPR running buffer was injected for 60 s and dissociated for 140 s.

**a**

Identity 29.0%  
Similarity 40.3%

|      |     |                                                   |     |
|------|-----|---------------------------------------------------|-----|
| FGF5 | 1   | -----MSLSFLLLLFFSHLILSAWAHGEKRLAPKGGQPPAATDRNPR   | 42  |
|      |     | : ...: :    : : :            : : : ...            |     |
| FGF4 | 1   | MSGPGTAAVALLPAVLL---ALLAPWA-----GR-GGAAAPTAPN     | 36  |
| FGF5 | 43  | GS-----SSRQSSSSAMSS--SASSSPAASLGSQGSGLQSSFWSPSG   | 85  |
|      |     | : ...: : : : : : : : : : : : : : : : : : : : :    |     |
| FGF4 | 37  | GTLEAELERRWESLVALSLARLPVAAQPKEAAVQSGAG-----DYLLGI | 80  |
| FGF5 | 86  | RRTGSLYCRVIGFHLQIYDPGKVNGSHEANMLSVLEIFAVSQGIVGIRG | 135 |
|      |     | : ...: : : : : : : : : : : : : : : : : : : : :    |     |
| FGF4 | 81  | KRLRRLYCNVIGFHLQALPDGRI GGAHADTRDLSLELSPVERGWSIFG | 130 |
| FGF5 | 136 | VFSNKFLAMSKKGLHASAKFTDDCKFRERFQENSYNTYASAIHREKTG  | 185 |
|      |     | : ...: : : : : : : : : : : : : : : : : : : : :    |     |
| FGF4 | 131 | VASRFVAMSSKGLYGSPFFTDECTFKEILLPNNYNAYESYKY-----   | 174 |
| FGF5 | 186 | REWYVALNKRKAKRGCSRVKQHIISTHFLPRFKQSEQPELSFTVTVPE  | 235 |
|      |     | ...: : : : : : : : : : : : : : : : : : : : :      |     |
| FGF4 | 175 | PGMFIALSKNGTKKG--NRVSPTMKVTHFLPRL-----            | 206 |
| FGF5 | 236 | KKKPPSPIKPKIPLSAPRKNNTNSVKYRLKFRFG                | 268 |
| FGF4 | 207 | -----                                             | 206 |

**b**

Identity 30.2%  
Similarity 40.6%

|      |     |                                                   |     |
|------|-----|---------------------------------------------------|-----|
| FGF5 | 1   | MSLSFLLLLFFS---HLILSAWAHGEKRLAPKG-----QPGPAATDRN  | 40  |
|      |     | : ...: : : : : : : : : : : : : : : : : : : : :    |     |
| FGF6 | 1   | MALGQKLFITMSRAGRLQGLWA---LVFLGILVGMVVPSPAGTRAN    | 45  |
| FGF5 | 41  | -----PRGSSSRQSSSSAMSSSSASSSPAASLGSQGSGLQSSFWSPSG  | 85  |
|      |     | : ...: : : : : : : : : : : : : : : : : : : : :    |     |
| FGF6 | 46  | NTLLDSRWGTLRSRA-----GLAGEIAGVNWESG                | 77  |
| FGF5 | 86  | -----RRTGSLYCRVIGFHLQIYDPGKVNGSHEANMLSVLEIFAVSQGI | 130 |
|      |     | : ...: : : : : : : : : : : : : : : : : : : : :    |     |
| FGF6 | 78  | YLVGIKRQRRLYCNVIGFHLQVLPDGRISGTHEENPYSLLEISTVERGV | 127 |
| FGF5 | 131 | VGIRGVFSNKFLAMSKKGLHASAKFTDDCKFRERFQENSYNTYASAIHR | 180 |
|      |     | : ...: : : : : : : : : : : : : : : : : : : : :    |     |
| FGF6 | 128 | VSLFGVRSALFVAMNSKGRLYATPSFQECKFRETLLPNNYNAYESDLYQ | 177 |
| FGF5 | 181 | TEKTGREWYVALNKRKAKRGCSRVKQHIISTHFLPRFKQSEQPELSFT  | 230 |
|      |     | : ...: : : : : : : : : : : : : : : : : : : : :    |     |
| FGF6 | 178 | GT-----YIALSKYGRVKRG--SKVSPIMTVTHFLPRI-----       | 208 |
| FGF5 | 231 | VTVPEKKKPPSPIKPKIPLSAPRKNNTNSVKYRLKFRFG           | 268 |
| FGF6 | 209 | -----                                             | 208 |

**Figure S4. Pairwise sequence alignment of FGF5 and FGF4 (a), FGF6 (b), FGF1 (c) or**

**FGF2 (d).** Sequence alignments were performed using EMBL-EBI search and sequence analysis

tool (<https://www.ebi.ac.uk/Tools/psa/>)<sup>1</sup>.

**c**

Identity 20.7%  
Similarity 30.0%

|      |     |                                                     |     |
|------|-----|-----------------------------------------------------|-----|
| FGF5 | 1   | MSLSFLLLLFFSHLILSAWAHGEKRLAPKQPGPAATDRNPRGSSSRQSS   | 50  |
| FGF1 | 1   | -----                                               | 0   |
| FGF5 | 51  | SSAMSSSSASSSPAASLGSQSGLEQSSFWSPSG--RRTGSLYCRVGI GF  | 99  |
| FGF1 | 1   | ---MAEGEITTFALT-----EKFNLPPGNYKKPKLLYCSNG--GH       | 36  |
| FGF5 | 100 | HLQIYPDGKVNGSHEANMLSV--LEIFAVSQGIVGIRGVFNSKFLAMSKKG | 148 |
| FGF1 | 37  | FLRILPDGTVDGTRDRSDQHIQLQLSAESVGEVYIKSTETGQYLAMD TDG | 86  |
| FGF5 | 149 | KLHASAKFTDDCKFRERFQENSYNTYASAIHRTEKTGREWYVALNKRGA   | 198 |
| FGF1 | 87  | LLYGSQTPNEECLFLERLEENHYNTYISKKH--AEK--NMFVGLKKN GSC | 132 |
| FGF5 | 199 | KRGCSPRVKQHIETHFLPRFKQSEQPELSFTVTVPEKKPPSP IKPKIP   | 248 |
| FGF1 | 133 | KRG--PRTHYGQKAILFLPLPVSSD-----                      | 155 |
| FGF5 | 249 | LSAPRKNTNSVKYRLKFRFG                                | 268 |
| FGF1 | 156 | -----                                               | 155 |

**d**

Identity 21.5%  
Similarity 31.7%

|      |     |                                                      |     |
|------|-----|------------------------------------------------------|-----|
| FGF5 | 1   | -----                                                | 0   |
| FGF2 | 1   | MVGVGGGDVEDVTPRPGGCQISGRGARGCNGIPGAAAWAALPRRRPRRH    | 50  |
| FGF5 | 1   | -----MSLSFLLLLFFSHLILSAWAHGEKRLA                     | 27  |
| FGF2 | 51  | PSVNPRSRAAGSPRTRGRRTEERPSSGSR-----GDRGRGRAL          | 88  |
| FGF5 | 28  | PKGQPGPAATDRNP-----RGSS-----SRQSSSSAMSSSS            | 58  |
| FGF2 | 89  | PGGRLGGRGRGRAPERVGGRRGRGTAAPRAAPAARGSRPGPAGTMAAGS    | 138 |
| FGF5 | 59  | ASSSPAASLGSQSGLEQSSFWSPSG--RRTGSLYCRVGI GFHLQIYPD    | 106 |
| FGF2 | 139 | ITTLPALP--EDGGSG---AF--PPGHFKDPKRL YCKNG--GFFLR IHPD | 179 |
| FGF5 | 107 | GKVNGSHEANMLSV--LEIFAVSQGIVGIRGVFNSKFLAMSKKGLHASAK   | 155 |
| FGF2 | 180 | GRVDGVREKSDPHIKLQLQAEERGVVSIKGVGANRYLAMKEDGRLLASKC   | 229 |
| FGF5 | 156 | FTDDCKFRERFQENSYNTYASAIHRTEKTGREWYVALNKRGA KRGCSPR   | 205 |
| FGF2 | 230 | VTDECEFFERLESNNYNTYRSRKYTS-----WYVALKRTGQYKLG--SK    | 271 |
| FGF5 | 206 | VKQHIETHFLPRFKQSEQPELSFTVTVPEKKPPSP IKPKIPLSAPRKN    | 255 |
| FGF2 | 272 | TGPGQKAILFLPMSAKS-----                               | 288 |
| FGF5 | 256 | TNSVKYRLKFRFG                                        | 268 |
| FGF2 | 289 | -----                                                | 288 |

**Figure S4 (continued). Pairwise sequence alignment of FGF5 and FGF4 (a), FGF6 (b), FGF1 (c) or FGF2 (d).**

a

Anti-FGF2 aptamer

5'-GGGAUACUAGGGCAUUAUGUUACCAGUGUAGUCCC-3'

Anti-FGFR1 aptamer

5'- GGAGGGAAAAGTTATCAGGTCAAACGTCTTTATGGCTGGGGATGGTGTG  
GGTTGTTTTGATTAGTTTTGGAGTACTCGCTCC-3'

Anti-FGFR3 aptamer

5'-AGCUCCAGAAGAUAAAUUACAGGCAGAGGCUGACGUAAACAGACAUU  
GAUGGGACCCACCCUUCGCGUGGCAACAACUAGGAUACUAUGACCCC-3'

b

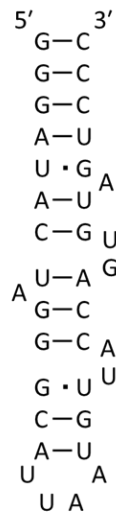

**Figure S5. Sequences and predicted secondary structure of aptamers against FGF2, FGFR1, and FGFR3.** (a) The sequences of the aptamers. All C and U of the anti-FGF2 aptamer and the anti-FGFR3 aptamer are 2'-fluoro modified. The anti-FGFR1 aptamer is DNA aptamer. (b) The secondary structure of the anti-FGF2 aptamer was predicted using the CentroidFold program (<http://rtools.cbrc.jp/centroidfold/>)<sup>2</sup>.

## References

1. Madeira, F. *et al.* The EMBL-EBI search and sequence analysis tools APIs in 2019. *Nucleic Acids Res.* **47**, W636-W641, doi: 10.1093/nar/gkz268 (2019).
2. Sato, K., Hamada, M., Asai, K. & Mituyama, T. CENTROIDFOLD: a web server for RNA secondary structure prediction. *Nucleic Acids Res.* **37**, W277-280, doi:10.1093/nar/gkp367 (2009).
